# Supplementary material
Source: Springer Nature journal article supplement (https://www.springermedizin.de/resource/supplementary/13051_2012_271_MOESM4_ESM.pdf/9670240)

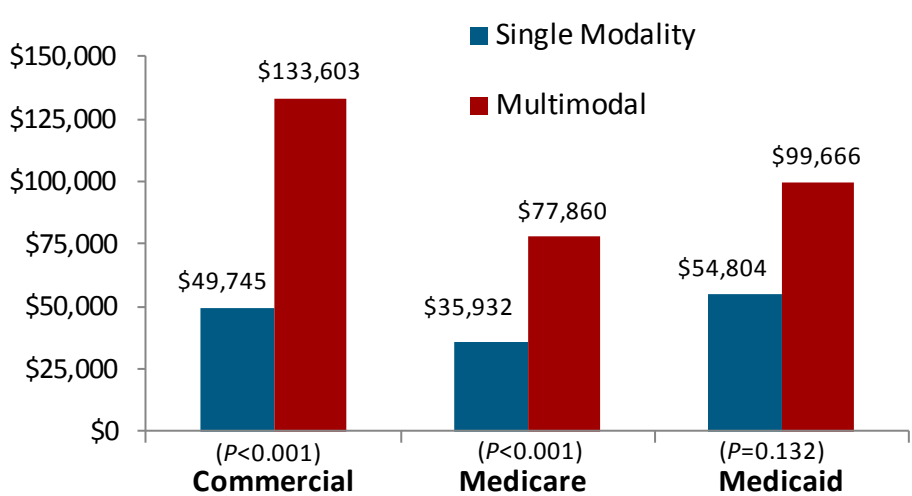

Supplement: MOESM4 [file 9670240]
